# Supplementary material for: Dendrobium Nobile Alcohol Extract Extends the Lifespan of Caenorhabditis elegans via hsf-1 and daf-16
Source: MDPI journal article supplement (doi:10.3390/molecules29040908), 2024-02-19
Supplement: s1 [file s1]

## **Supplementary Tables**

### **Contents:**

**Table S1. Lifespan of wild-type nematode (N2) treated with DnAE in different concentrations.**

**Table S2. Lifespan of wild-type nematode (N2) treated with 214  $\mu$ mol/ml EtOH (consistent with the concentration of alcohol contained in 1 mg/ml DnAE)**

**Table S3 Effect of DnAE on oviposition rate of N2 worm.**

**Table S4. Effect of DnAE on pharyngeal pumping in wild-type nematode (N2).**

**Table S5. Effect of DnAE on body movement in wild-type nematode (N2).**

**Table S6. Effect of DnAE on lipofuscin in wild-type nematode (N2).**

**Table S7. Effect of DnAE on resistance to high temperature and oxidation in wild-type nematode (N2).**

**Table S8. Effect of DnAE on ROS level of N2 nematode.**

**Table S9. Effect of DnAE on SOD level of N2 nematode.**

**Table S10. Effect of DnAE on expression of HSP-12.6, SOD-3, GST-4, DAF-16 in mutant nematode.**

**Table S11. Effect of DnAE on lifespan of mutant nematode.**

**Table S12. Effects of DnAE on Parkinson's disease model.**

**Table S13. Effects of DnAE on Alzheimer's disease model.**

**Table S14. Effect of DnAE on gene expression at mRNA level in nematode.**

**Table S15. Primers used for the analysis of mRNA expression levels in nematode.**

**Table S1. Lifespan of wild-type nematode (N2) treated with DnAE in different concentrations.**

| <b>Figure 1A</b>             |       | Control (0μM)       | 200μg/ml            | 500μg/ml            | 1000μg/ml           |
|------------------------------|-------|---------------------|---------------------|---------------------|---------------------|
| Concentration                |       |                     | DnAE                | DnAE                | DnAE                |
| strain                       |       | <b>N2(WT)</b>       | <b>N2(WT)</b>       | <b>N2(WT)</b>       | <b>N2(WT)</b>       |
| Treatments                   |       | 20°C/OP50<br>(dead) | 20°C/OP50<br>(dead) | 20°C/OP50<br>(dead) | 20°C/OP50<br>(dead) |
| Mean±SEM                     | EXP.1 | 18.933±0.926        | 20.233±0.998        | 21.939±0.990        | 22.979±1.005        |
|                              | EXP.2 | 18.663±0.728        | 20.374±0.972        | 21.243±0.961        | 22.270±0.938        |
|                              | EXP.3 | 19.487±0.824        | 20.455±0.983        | 21.232±0.825        | 22.837±0.988        |
| <i>P</i> value<br>VS control | EXP.1 |                     | 0.1594              | 0.0069              | 0.0013              |
|                              | EXP.2 |                     | 0.1325              | 0.0038              | 0.0009              |
|                              | EXP.3 |                     | 0.1932              | 0.0098              | 0.0023              |
| N                            | EXP.1 | 63                  | 62                  | 65                  | 68                  |
|                              | EXP.2 | 73                  | 72                  | 75                  | 74                  |
|                              | EXP.3 | 73                  | 73                  | 77                  | 77                  |
| change in mean<br>lifespan   | EXP.1 |                     | 6.87%               | 15.88%              | 21.37%              |
|                              | EXP.2 |                     | 9.34%               | 14.01%              | 19.51%              |
|                              | EXP.3 |                     | 4.97%               | 8.95%               | 17.19%              |

**Table S2. Lifespan of wild-type nematode (N2) treated with 214  $\mu$ mol/ml EtOH  
(consistent with the concentration of alcohol contained in 1 mg/ml DnAE)**

| Figure    | Strain  | Treatment             | Mean lifespan<br>$\pm$ SEM<br>(days) | P value<br>VS<br>control | change in<br>mean<br>lifespan | N  |
|-----------|---------|-----------------------|--------------------------------------|--------------------------|-------------------------------|----|
|           | N2 (WT) | 20°C                  | Days                                 |                          |                               |    |
| <b>1B</b> | EXP.1   | control               | 18.643 $\pm$ 0.672                   | 0.4754                   | #                             | 61 |
|           | EXP.1   | 214 $\mu$ mol/ml EtOH | 18.827 $\pm$ 0.726                   |                          |                               | 61 |
|           | EXP.2   | control               | 19.224 $\pm$ 0.526                   | 0.2637                   | #                             | 65 |
|           | EXP.2   | 214 $\mu$ mol/ml EtOH | 18.824 $\pm$ 0.982                   |                          |                               | 75 |
|           | EXP.3   | control               | 19.453 $\pm$ 0.530                   | 0.6283                   | #                             | 60 |
|           | EXP.3   | 214 $\mu$ mol/ml EtOH | 19.295 $\pm$ 0.612                   |                          |                               | 66 |

S1-S2: *p*-value was analyzed by log-rank (Mantel-Cox) test.

N: number of dead worms.

*P* <0.05 indicated that the experiment was statistically significant, while *P* >0.05 indicated that the experiment was not statistically significant.

**Table S3 Effect of DnAE on oviposition rate of N2 worm.**

| Days  | Strains        | Treatments             | Mean offspring<br>±SEM | P value<br>VS<br>control | N |
|-------|----------------|------------------------|------------------------|--------------------------|---|
|       | <b>N2(WT)</b>  | <b>OP50(dead) 20°C</b> |                        |                          |   |
| 1     | EXP.1          | control                | 53.00±1.566            | 0.943                    | 3 |
|       | EXP.1          | 1mg/ml DnAE            | 53.33±2.053            |                          |   |
| 2     | EXP.1          | control                | 152.3±6.467            | 0.377                    | 3 |
|       | EXP.1          | 1mg/ml DnAE            | 146.7±5.974            |                          |   |
| 3     | EXP.1          | control                | 47.33±2.940            | 0.696                    | 3 |
|       | EXP.1          | 1mg/ml DnAE            | 49.00±3.105            |                          |   |
| 4     | EXP.1          | control                | 26.67±1.394            | 0.768                    | 3 |
|       | EXP.1          | 1mg/ml DnAE            | 27.00±1.293            |                          |   |
| 5     | EXP.1          | control                | 12.00±1.283            | 0.629                    | 3 |
|       | EXP.1          | 1mg/ml DnAE            | 10.00±0.838            |                          |   |
| Total | EXP.1          | control                | 291.3±6.323            | 0.169                    | 3 |
|       | EXP.1          | 1mg/ml DnAE            | 282.7±6.923            |                          |   |
|       | <b>N2 (WT)</b> | <b>OP50(dead) 20°C</b> |                        |                          |   |
| 1     | EXP.2          | control                | 48.67±1.384            | 0.165                    | 3 |
|       | EXP.2          | 1mg/ml DnAE            | 54.33±1.345            |                          |   |
| 2     | EXP.2          | control                | 156.7±4.389            | 0.126                    | 3 |
|       | EXP.2          | 1mg/ml DnAE            | 146.3±5.228            |                          |   |
| 3     | EXP.2          | control                | 50.67±2.993            | 0.294                    | 3 |
|       | EXP.2          | 1mg/ml DnAE            | 53.33±3.232            |                          |   |
| 4     | EXP.2          | control                | 30.00±1.323            | 0.439                    | 3 |
|       | EXP.2          | 1mg/ml DnAE            | 28.33±1.394            |                          |   |
| 5     | EXP.2          | control                | 16.67±1.339            | 0.341                    | 3 |
|       | EXP.2          | 1mg/ml DnAE            | 14.00±1.832            |                          |   |
| Total | EXP.2          | control                | 302.7±6.822            | 0.578                    | 3 |
|       | EXP.2          | 1mg/ml DnAE            | 296.3±7.360            |                          |   |
|       | <b>N2 (WT)</b> | <b>OP50(dead) 20°C</b> |                        |                          |   |
| 1     | EXP.3          | control                | 49.33±2.283            | 0.493                    | 3 |
|       | EXP.3          | 1mg/ml DnAE            | 46.33±1.92             |                          |   |
| 2     | EXP.3          | control                | 142.3±4.263            | 0.916                    | 3 |
|       | EXP.3          | 1mg/ml DnAE            | 142.7±3.911            |                          |   |
| 3     | EXP.3          | control                | 49.00±1.293            | 0.922                    | 3 |

**Figure1C**

|       |       |             |             |       |   |
|-------|-------|-------------|-------------|-------|---|
|       | EXP.3 | 1mg/ml DnAE | 49.33±1.178 |       |   |
| 4     | EXP.3 | control     | 30.00±1.134 | 0.613 | 3 |
|       | EXP.3 | 1mg/ml DnAE | 29.00±1.384 |       |   |
| 5     | EXP.3 | control     | 12.67±0.490 | 0.402 | 3 |
|       | EXP.3 | 1mg/ml DnAE | 10.33±0.379 |       |   |
| Total | EXP.3 | control     | 283.3±6.915 | 0.346 | 3 |
|       | EXP.3 | 1mg/ml DnAE | 277.7±6.559 |       |   |

**Table S4. Effect of DnAE on pharyngeal pumping in wild-type nematode (N2).**

| Figure    | Strain        | Treatment        | Mean Pigment<br>±SEM | P value<br>VS<br>control | N  |
|-----------|---------------|------------------|----------------------|--------------------------|----|
| <b>1D</b> | <b>N2(WT)</b> | OP50(dead)       | 3 days of adult      |                          |    |
|           | EXP.1         | 20°C/control     | 29.30±0.6549         | 0.2326                   | 20 |
|           | EXP.1         | 20°C/1mg/ml DnAE | 29.65±0.6832         |                          | 20 |
|           | EXP.2         | 20°C/control     | 31.37±0.6982         | 0.1937                   | 20 |
|           | EXP.2         | 20°C/1mg/ml DnAE | 30.63±0.6039         |                          | 20 |
|           | EXP.3         | 20°C/control     | 31.16±0.6121         | 0.2142                   | 20 |
|           | EXP.3         | 20°C/1mg/ml DnAE | 30.43±0.5893         |                          | 20 |

The pharyngeal pumping count time was 10 seconds per nematode. N was the experimental sample size, and P value was calculated by two-tailed t-test.  $P < 0.05$  indicated that the experiment was statistically significant

**Table S5. Effect of DnAE on body movement in wild-type nematode (N2).**

| Figure    | Strain        | Treatment        | Mean Pigment<br>±SEM | P value<br>VS<br>control | N  |
|-----------|---------------|------------------|----------------------|--------------------------|----|
| <b>1E</b> | <b>N2(WT)</b> | OP50(dead)       | 3 days of adult      |                          |    |
|           | EXP.1         | 20°C/control     | 34.70±0.7749         | 0.2888                   | 20 |
|           | EXP.1         | 20°C/1mg/ml DnAE | 35.65±0.6893         |                          | 20 |
|           | EXP.2         | 20°C/control     | 32.46±0.5452         | 0.1733                   | 20 |
|           | EXP.2         | 20°C/1mg/ml DnAE | 34.13±0.5029         |                          | 20 |
|           | EXP.3         | 20°C/control     | 31.16±0.4832         | 0.364                    | 20 |
|           | EXP.3         | 20°C/1mg/ml DnAE | 32.17±0.5923         |                          | 20 |

The body movement count time was 20 seconds per nematode. N was the experimental sample size, and P value was calculated by two-tailed t-test.  $P < 0.05$  indicated that the experiment was statistically significant

**Table S6. Effect of DnAE on lipofuscin in wild-type nematode (N2).**

| Figure    | Strain        | Treatments          | Mean Pigment<br>±SEM | <i>P</i> value<br>VS<br>control | N  |
|-----------|---------------|---------------------|----------------------|---------------------------------|----|
| <b>1F</b> | <b>N2(WT)</b> | <b>20°C 5 days</b>  |                      |                                 |    |
|           | EXP.1         | control             | 18.06±0.921          | <0.00001                        | 29 |
|           | EXP.1         | 1mg/ml DnAE         | 8.635±0.448          |                                 | 30 |
|           | EXP.2         | control             | 16.31±0.954          | <0.00001                        | 30 |
|           | EXP.2         | 1mg/ml DnAE         | 7.41±0.351           |                                 | 30 |
|           | EXP.3         | control             | 18.39±0.720          | <0.00001                        | 25 |
|           | EXP.3         | 1mg/ml DnAE         | 10.02±0.322          |                                 | 29 |
| <b>1F</b> | <b>N2(WT)</b> | <b>20°C 10 days</b> |                      |                                 |    |
|           | EXP.1         | control             | 36.54±1.293          | 0.0011                          | 29 |
|           |               | 1mg/ml DnAE         | 33.44±1.048          |                                 | 30 |
|           | EXP.2         | control             | 34.31±0.954          | 0.0008                          | 30 |
|           |               | 1mg/ml DnAE         | 30.41±1.151          |                                 | 30 |
|           | EXP.3         | control             | 29.89±0.820          | 0.0015                          | 25 |
|           |               | 1mg/ml DnAE         | 27.02±0.769          |                                 | 29 |

On the 5 and 10 day of the adult worm, the accumulation of lipofuscin in intestinal tissues of the treated and untreated nematodes was photographed and counted. Fluorescence intensity was analyzed by Image J, and *p* value was calculated by two-tailed t-test, where *P* < 0.05 indicated that the experiment was statistically significant

**Table S7. Effect of DnAE on resistance to high temperature and oxidation in wild-type nematode (N2).**

| Figure    | Strain    | Treatment                         | Mean lifespan<br>±SEM | P value<br>VS<br>control | change in mean<br>lifespan | N  |
|-----------|-----------|-----------------------------------|-----------------------|--------------------------|----------------------------|----|
| <b>4B</b> | <b>N2</b> | <b>Paraquat</b>                   | Days                  |                          |                            |    |
|           | EXP.1     | 20°C/control                      | 9.436±0.493           | 0.010                    | 21.87%                     | 80 |
|           | EXP.1     | 20°C/1mg/ml<br>DnAE               | 11.500±0.611          |                          |                            | 82 |
|           | EXP.2     | 20°C/control                      | 8.581±0.343           | 0.031                    | 19.24%                     | 70 |
|           | EXP.2     | 20°C/1mg/ml<br>DnAE               | 10.232±0.549          |                          |                            | 76 |
|           | EXP.3     | 20°C/control                      | 9.059±0.603           | 0.018                    | 19.87%                     | 80 |
|           | EXP.3     | 20°C/1mg/ml<br>DnAE               | 10.858±0.307          |                          |                            | 85 |
| <b>4A</b> | <b>N2</b> | <b>H<sub>2</sub>O<sub>2</sub></b> | Hours                 |                          |                            |    |
|           | EXP.1     | 20°C/control                      | 4.750±0.234           | 0.007                    | 23.16%                     | 74 |
|           | EXP.1     | 20°C/1mg/ml<br>DnAE               | 5.850±0.311           |                          |                            | 78 |
|           | EXP.2     | 20°C/control                      | 4.612±0.243           | 0.002                    | 19.39%                     | 84 |
|           | EXP.2     | 20°C/1mg/ml<br>DnAE               | 5.506±0.303           |                          |                            | 80 |
|           | EXP.3     | 20°C/control                      | 4.085±0.206           | 0.011                    | 20.38%                     | 85 |
|           | EXP.3     | 20°C/1mg/ml<br>DnAE               | 4.917±0.278           |                          |                            | 81 |
| <b>3A</b> | <b>N2</b> | <b>37°C</b>                       | Hours                 |                          |                            |    |
|           | EXP.1     | control                           | 3.256±0.200           | 0.0007                   | 34.09%                     | 65 |
|           | EXP.1     | 1mg/ml DnAE                       | 4.366±0.254           |                          |                            | 78 |
|           | EXP.2     | control                           | 3.612±0.173           | 0.0011                   | 28.39%                     | 88 |
|           | EXP.2     | 1mg/ml DnAE                       | 4.637±0.209           |                          |                            | 81 |
|           | EXP.3     | control                           | 3.485±0.201           | 0.0021                   | 30.78%                     | 80 |
|           | EXP.3     | 1mg/ml DnAE                       | 4.558±0.208           |                          |                            | 81 |

*p*-value was analyzed by log-rank (Mantel-Cox) test.

N: number of dead worms.

*P* <0.05 indicated that the experiment was statistically significant, while *P* >0.05 indicated that the experiment was not statistically significant.



**Table S8. Effect of DnAE on ROS level of N2 nematode.**

| Figure    | Strain        | Treatment                   | Mean $\pm$ SEM     | P value<br>VS<br>Control | N  |
|-----------|---------------|-----------------------------|--------------------|--------------------------|----|
| <b>4D</b> | <b>N2(WT)</b> | 20°C OP50(dead)             |                    |                          |    |
|           | EXP.1         | Control                     | 10.24 $\pm$ 0.1531 |                          | 22 |
|           | EXP.1         | 1mg/ml DnAE                 | 7.889 $\pm$ 0.2475 | <0.0001                  | 23 |
|           | EXP.1         | 4mM Paraquat                | 18.23 $\pm$ 0.2392 | <0.0001                  | 20 |
|           | EXP.1         | 4mM Paraquat<br>1mg/ml DnAE | 16.40 $\pm$ 0.4523 | <0.0001                  | 21 |
|           | EXP.2         | Control                     | 14.318 $\pm$ 0.521 |                          | 33 |
|           | EXP.2         | 1mg/ml DnAE                 | 10.964 $\pm$ 0.391 | <0.0001                  | 29 |
|           | EXP.2         | 4mM Paraquat                | 20.140 $\pm$ 0.620 | <0.0001                  | 33 |
|           | EXP.2         | 4mM Paraquat<br>1mg/ml DnAE | 18.172 $\pm$ 0.667 | <0.0001                  | 35 |
|           | EXP.3         | Control                     | 18.283 $\pm$ 0.226 |                          | 30 |
|           | EXP.3         | 1mg/ml DnAE                 | 15.293 $\pm$ 0.469 | <0.0001                  | 27 |
|           | EXP.3         | 4mM Paraquat                | 27.394 $\pm$ 0.392 | <0.0001                  | 30 |
|           | EXP.3         | 4mM Paraquat<br>1mg/ml DnAE | 22.312 $\pm$ 0.683 | <0.0001                  | 33 |

ROS levels were quantified using the cell membrane-permeable reactive oxygen species (ROS) detection probe H2DCFH-DA. the accumulation of ROS was photographed and counted. Fluorescence intensity was analyzed by Image J, and *p* value was calculated by two-tailed t-test, where *P* < 0.05 indicated that the experiment was statistically significant.

**Table S9. Effect of DnAE on SOD level of N2 nematode.**

| Figure | Strain  | Treatment   | SOD activity | P value<br>VS<br>control |
|--------|---------|-------------|--------------|--------------------------|
| 4C     | N2 (WT) | 20°C        |              |                          |
|        | EXP.1   | control     | 7.3321±0.122 | 0.0050                   |
|        | EXP.1   | 1mg/ml DnAE | 9.7259±0.096 |                          |
|        | EXP.2   | control     | 6.224±0.106  | 0.0037                   |
|        | EXP.2   | 1mg/ml DnAE | 10.824±0.192 |                          |
|        | EXP.3   | control     | 12.453±0.249 | 0.0183                   |
|        | EXP.3   | 1mg/ml DnAE | 14.295±0.212 |                          |

*p* value was calculated by two-tailed t-test

N: number of dead worms.  $N \geq 1000$ .

$P < 0.05$  indicated that the experiment was statistically significant.

**Table S10. Effect of DnAE on expression of HSP-12.6, SOD-3, GST-4, DAF-16 in mutant nematode.**

| Figure | Strain                                        | Treatment                | Fluorescence<br>intensity<br>Mean $\pm$ SEM | P value <sup>1</sup> | N  |
|--------|-----------------------------------------------|--------------------------|---------------------------------------------|----------------------|----|
| 3C     | <b>TJ375</b><br><i>gpIs1 (hsp-16.2p::GFP)</i> |                          | OP50(dead)                                  |                      |    |
|        | EXP.1                                         | 20°C/control             | 4.614 $\pm$ 0.2891                          | 0.0021               | 31 |
|        | EXP.1                                         | 20°C/1mg/ml DnAE         | 6.457 $\pm$ 0.6876                          |                      | 31 |
|        | EXP.1                                         | 35°C 1h                  | 26.44 $\pm$ 3.199                           | 0.0249               | 25 |
|        | EXP.1                                         | 35°C1h/1mg/ml DnAE       | 28.02 $\pm$ 2.548                           |                      | 27 |
|        | EXP.2                                         | 20°C/control             | 5.233 $\pm$ 0.158                           | 0.0036               | 36 |
|        | EXP.2                                         | 20°C/1mg/ml DnAE         | 7.526 $\pm$ 0.152                           |                      | 34 |
|        | EXP.2                                         | 35°C 1h                  | 22.26 $\pm$ 2.293                           | 0.0162               | 34 |
|        | EXP.2                                         | 35°C1h/1mg/ml DnAE       | 24.02 $\pm$ 2.521                           |                      | 27 |
|        | EXP.3                                         | 20°C/control             | 4.238 $\pm$ 0.1928                          | 0.0022               | 28 |
|        | EXP.3                                         | 20°C/1mg/ml DnAE         | 6.263 $\pm$ 0.5278                          |                      | 32 |
|        | EXP.3                                         | 35°C 1h                  | 25.27 $\pm$ 2.349                           | 0.0527               | 22 |
|        | EXP.3                                         | 35°C1h/1mg/ml DnAE       | 28.32 $\pm$ 2.364                           |                      | 25 |
| 5B     | <b>CL2166</b><br><i>dvIs19 (gst-4p::GFP)</i>  |                          | 20°C OP50(dead)                             |                      |    |
|        | EXP.1                                         | control                  | 14.50 $\pm$ 0.4102                          | <0.0001              | 38 |
|        | EXP.1                                         | 1mg/ml DnAE              | 19.11 $\pm$ 0.4200                          |                      | 36 |
|        | EXP.1                                         | 4mM Paraquat             | 9.581 $\pm$ 0.3027                          | <0.0001              | 43 |
|        | EXP.1                                         | 1mg/ml DnAE 4mM Paraquat | 12.22 $\pm$ 0.3090                          |                      | 39 |
|        | EXP.2                                         | control                  | 11.26 $\pm$ 0.3760                          | <0.0001              | 34 |
|        | EXP.2                                         | 1mg/ml DnAE              | 14.77 $\pm$ 0.3224                          |                      | 36 |
|        | EXP.2                                         | 4mM Paraquat             | 8.283 $\pm$ 0.3983                          | <0.0001              | 35 |
|        | EXP.2                                         | 1mg/ml DnAE 4mM Paraquat | 10.27 $\pm$ 0.3451                          |                      | 33 |
|        | EXP.3                                         | control                  | 9.553 $\pm$ 0.3964                          | <0.0001              | 31 |
|        | EXP.3                                         | 1mg/ml DnAE              | 13.28 $\pm$ 0.4340                          |                      | 36 |
|        | EXP.3                                         | 4mM Paraquat             | 8.391 $\pm$ 0.3237                          | <0.0001              | 40 |
|        | EXP.3                                         | 1mg/ml DnAE 4mM Paraquat | 10.25 $\pm$ 0.3543                          |                      | 38 |
| 5C     | <b>CF1553</b><br><i>zcIs13 (sod-3p::GFP)</i>  |                          | OP50(dead)                                  |                      |    |

|       |                          |              |         |    |
|-------|--------------------------|--------------|---------|----|
| EXP.1 | control                  | 11.00±0.2183 | <0.0001 | 21 |
| EXP.1 | 1mg/ml DnAE              | 13.21±0.2854 |         | 24 |
| EXP.1 | 4mM Paraquat             | 8.163±0.2220 |         | 32 |
| EXP.1 | 1mg/ml DnAE 4mM Paraquat | 9.577±0.2282 | 0.0003  | 23 |
| EXP.2 | control                  | 12.37±0.2233 | <0.0001 | 32 |
| EXP.2 | 1mg/ml DnAE              | 14.22±0.2804 |         | 25 |
| EXP.2 | 4mM Paraquat             | 8.273±0.2660 |         | 32 |
| EXP.2 | 1mg/ml DnAE 4mM Paraquat | 9.746±0.2228 | 0.0023  | 27 |
| EXP.3 | control                  | 10.88±0.2142 | 0.0003  | 33 |
| EXP.3 | 1mg/ml DnAE              | 12.54±0.2464 |         | 34 |
| EXP.3 | 4mM Paraquat             | 8.453±0.2022 |         | 32 |
| EXP.3 | 1mg/ml DnAE 4mM Paraquat | 9.863±0.3100 | 0.0010  | 32 |

| Figure | Strain                                 | Treatment                   | Cytosolic | Intermediate | Nuclear | N  |
|--------|----------------------------------------|-----------------------------|-----------|--------------|---------|----|
| 5A     | <b>TJ356</b>                           |                             |           |              |         |    |
|        | <b>zIs356(daf-16p::daf-16a/b::GFP)</b> |                             |           |              |         |    |
|        | 20°C OP50(dead)                        |                             |           |              |         |    |
|        | EXP.1                                  | control                     | 35        |              |         | 35 |
|        | EXP.1                                  | 1mg/ml DnAE                 | 29        |              |         | 29 |
|        | EXP.1                                  | 4mM Paraquat                | 3         | 18           | 12      | 33 |
|        | EXP.1                                  | 4mM Paraquat<br>1mg/ml DnAE | 2         | 11           | 14      | 27 |
|        | EXP.1                                  | control                     | 30        |              |         | 30 |
|        | EXP.1                                  | 1mg/ml DnAE                 | 26        |              |         | 26 |
|        | EXP.1                                  | 4mM Paraquat                | 3         | 20           | 7       | 30 |
|        | EXP.1                                  | 4mM Paraquat<br>1mg/ml DnAE | 3         | 12           | 16      | 31 |
|        | EXP.1                                  | control                     | 25        |              |         | 25 |
|        | EXP.1                                  | 1mg/ml DnAE                 | 26        |              |         | 26 |
|        | EXP.1                                  | 4mM Paraquat                | 3         | 15           | 6       | 24 |
|        | EXP.1                                  | 4mM Paraquat<br>1mg/ml DnAE | 2         | 10           | 12      | 24 |

Fluorescence intensity was analyzed by Image J, and p value was calculated by two-tailed t-test, where P <0.05 indicated that the experiment was statistically significant.

**Table S11. Effect of DnAE on lifespan of mutant nematode.**

| Figure    | Strain                                 | Treatment       | Mean lifespan<br>±SEM<br>(days) | P value<br>VS<br>control | change in<br>mean<br>lifespan | N  |
|-----------|----------------------------------------|-----------------|---------------------------------|--------------------------|-------------------------------|----|
| <b>3D</b> | <b>PS3551</b><br><i>hsf-1 (sy441).</i> | 20°C OP50(dead) | Days                            |                          |                               |    |
|           | EXP.1                                  | control         | 15.172±0.926                    | 0.2559                   | #                             | 60 |
|           | EXP.1                                  | 1mg/ml DnAE     | 15.688±1.298                    |                          |                               | 77 |
|           | EXP.2                                  | control         | 15.224±0.689                    | 0.2862                   | #                             | 77 |
|           | EXP.2                                  | 1mg/ml DnAE     | 14.824±0.982                    |                          |                               | 85 |
|           | EXP.3                                  | control         | 14.453±0.536                    | 0.6161                   | #                             | 66 |
|           | EXP.3                                  | 1mg/ml DnAE     | 14.075±0.619                    |                          |                               | 68 |
| <b>6B</b> | <b>CF1038</b><br><i>daf-16 (mu86).</i> | 20°C OP50(dead) |                                 |                          |                               |    |
|           | EXP.1                                  | control         | 12.361±0.564                    | 0.1651                   | #                             | 79 |
|           | EXP.1                                  | 1mg/ml DnAE     | 12.727±0.588                    |                          |                               | 78 |
|           | EXP.2                                  | control         | 13.158±0.511                    | 0.2112                   | #                             | 70 |
|           | EXP.2                                  | 1mg/ml DnAE     | 12.215±0.405                    |                          |                               | 80 |
|           | EXP.3                                  | control         | 11.832±0.505                    | 0.2938                   | #                             | 61 |
|           | EXP.3                                  | 1mg/ml DnAE     | 12.292±0.650                    |                          |                               | 64 |
| <b>6C</b> | <b>CB1370</b><br><i>daf-2 (e1370).</i> | 20°C OP50(dead) |                                 |                          |                               |    |
|           | EXP.1                                  | control         | 43.410±1.886                    | 0.1373                   | #                             | 77 |
|           | EXP.1                                  | 1mg/ml DnAE     | 42.788±2.620                    |                          |                               | 73 |
|           | EXP.2                                  | control         | 42.767±1.458                    | 0.110                    | #                             | 88 |
|           | EXP.2                                  | 1mg/ml DnAE     | 43.157±1.520                    |                          |                               | 78 |
|           | EXP.3                                  | control         | 39.284±1.592                    | 0.716                    | #                             | 67 |
|           | EXP.3                                  | 1mg/ml DnAE     | 40.032±1.532                    |                          |                               | 76 |

*p*-value was analyzed by log-rank (Mantel-Cox) test.

N: number of dead worms.

*P* <0.05 indicated that the experiment was statistically significant, while *P* >0.05 indicated that the experiment was not statistically significant.

**Table S12. Effects of DnAE on Parkinson**

| <b>PD</b> |                            |                             |                  |         |    |
|-----------|----------------------------|-----------------------------|------------------|---------|----|
| Figure    | Strain                     | Treatment                   | Mean±SEM<br>Days | P value | N  |
| <b>7B</b> | <b>BZ555</b>               | 20°C OP50(dead)             |                  |         |    |
|           | <i>egIs1(DAT-1::GFP)</i>   |                             |                  |         |    |
|           | EXP.1                      | 50mM 6-OHDA                 | 16.10±0.7446     |         | 22 |
|           | EXP.1                      | 50mM 6-OHDA<br>+1mg/ml DnAE | 20.20±0.7072     | <0.0001 | 20 |
|           | EXP.1                      | 50mM 6-OHDA<br>+2mM L-DA    | 21.09±0.5886     | <0.0001 | 20 |
|           | EXP.1                      | Control                     | 22.04±0.5842     | <0.0001 | 20 |
|           | EXP.2                      | 50mM 6-OHDA                 | 15.04±0.4292     |         | 23 |
|           | EXP.2                      | 50mM 6-OHDA<br>+1mg/ml DnAE | 18.31±0.8639     | 0.0036  | 22 |
|           | EXP.2                      | 50mM 6-OHDA<br>+2mM L-DA    | 20.12±0.5639     | <0.0001 | 22 |
|           | EXP.2                      | Control                     | 20.93±0.9378     | <0.0001 | 21 |
|           | EXP.3                      | 50mM 6-OHDA                 | 16.32±0.5386     |         | 25 |
|           | EXP.3                      | 50mM 6-OHDA<br>+1mg/ml DnAE | 18.54±0.7210     | 0.0004  | 24 |
|           | EXP.3                      | 50mM 6-OHDA<br>+2mM L-DA    | 19.38±0.5248     | <0.0001 | 29 |
|           | EXP.3                      | Control                     | 21.22±0.9218     | <0.0001 | 21 |
| <b>7A</b> | <b>N5901</b>               | 5 days of adult             |                  |         |    |
|           | <b>Punc-54::α-syn::YFP</b> |                             |                  |         |    |
|           | EXP.1                      | control                     | 11.230±1.073     | <0.0001 | 35 |
|           | EXP.1                      | 1mg/ml DnAE                 | 9.188±1.534      |         | 27 |
|           | EXP.1                      | DR                          | 8.347±1.069      | <0.0001 | 29 |
|           | EXP.1                      | DR+1mg/ml DnAE              | 6.420±1.070      |         | 32 |
|           | EXP.2                      | control                     | 14.678±1.580     | 0.0008  | 30 |
|           | EXP.2                      | 1mg/ml DnAE                 | 11.391±1.447     |         | 31 |
|           | EXP.2                      | DR                          | 9.347±1.273      | 0.0002  | 26 |
|           | EXP.2                      | DR+1mg/ml DnAE              | 7.620±1.270      |         | 34 |
|           | EXP.3                      | control                     | 13.348±1.720     | 0.0021  | 27 |
|           | EXP.3                      | 1mg/ml DnAE                 | 11.321±1.441     |         | 27 |
|           | EXP.3                      | DR                          | 10.233±1.772     | <0.0001 | 28 |
|           | EXP.3                      | DR+1mg/ml DnAE              | 8.273±1.491      |         | 30 |

Fluorescence intensity was analyzed by Image J, and p value was calculated by two-tailed t-test, where P <0.05 indicated that the experiment was statistically significant.

**Table S13. Effects of DnAE on Alzheimer**

| Figure    | Strain                                                                         | Treatment   | Mean hours<br>±SEM | P value<br>VS<br>control | change in<br>mean time | N  |
|-----------|--------------------------------------------------------------------------------|-------------|--------------------|--------------------------|------------------------|----|
| <b>7C</b> | <b>CL4176<br/>dvIs27 [myo-<br/>3p::A-Beta (1-<br/>42)::let-851<br/>3'UTR)]</b> |             |                    |                          |                        |    |
|           |                                                                                | <b>25°C</b> | <b>Hours</b>       |                          |                        |    |
|           | EXP.1                                                                          | control     | 32.967±0.283       |                          |                        | 61 |
|           | EXP.1                                                                          | DnAE        | 34.328±0.344       | 0.0023                   | 4.13%                  | 61 |
|           | EXP.2                                                                          | DR          | 34.355±0.367       | 0.0019                   | 4.21%                  | 65 |
|           | EXP.2                                                                          | DR + DnAE   | 35.123±0.345       | <0.0001                  | 6.53%                  | 73 |
|           | EXP.2                                                                          | control     | 30.453±0.330       |                          |                        | 60 |
|           | EXP.2                                                                          | DnAE        | 32.495±0.322       | 0.0033                   | 6.70%                  | 66 |
|           | EXP.2                                                                          | DR          | 32.667±0.427       | 0.0024                   | 7.27%                  | 67 |
|           | EXP.2                                                                          | DR + DnAE   | 33.371±0.571       | 0.0002                   | 9.66%                  | 77 |
|           | EXP.3                                                                          | control     | 32.189±0.327       |                          |                        | 70 |
|           | EXP.3                                                                          | DnAE        | 34.501±0.401       | 0.0043                   | 7.18%                  | 71 |
|           | EXP.3                                                                          | DR          | 34.428±0.390       | 0.0053                   | 7.01%                  | 68 |
|           | EXP.3                                                                          | DR + DnAE   | 35.652±0.326       | 0.0004                   | 10.76%                 | 71 |

p-value was analyzed by log-rank (Mantel-Cox) test.

N: number of dead worms.

P <0.05 indicated that the experiment was statistically significant, while P >0.05 indicated that the experiment was not statistically significant.

**Table S14. Effect of DnAE on gene expression at mRNA level in nematode.**

| <b>Gene</b>     | <b>EXP.1</b> | <b>EXP.2</b> | <b>EXP.3</b> | <b>Mean</b> | <b>SEM</b> |
|-----------------|--------------|--------------|--------------|-------------|------------|
| Control         | 1            | 1            | 1            | 1           | 0          |
| <i>daf-16</i>   | 2.329        | 3.577        | 2.345        | 2.884       | 0.366      |
| <i>skn-1</i>    | 0.763        | 0.969        | 1.063        | 0.932       | 0.088      |
| <i>daf-2</i>    | 0.491        | 0.680        | 0.562        | 0.578       | 0.055      |
| <i>gst-4</i>    | 1.507        | 1.780        | 2.275        | 1.854       | 0.224      |
| <i>sod-3</i>    | 2.175        | 2.051        | 1.931        | 2.053       | 0.070      |
| <i>ctl-1</i>    | 1.259        | 1.456        | 1.672        | 1.462       | 0.119      |
| <i>hsf-1</i>    | 4.665        | 3.164        | 3.498        | 3.775       | 0.454      |
| <i>hsp-16.1</i> | 1.886        | 1.411        | 1.567        | 1.621       | 0.139      |
| <i>hsp-16.2</i> | 1.264        | 1.453        | 1.483        | 1.400       | 0.068      |
| <i>hsp-6</i>    | 1.820        | 1.759        | 1.881        | 1.820       | 0.035      |
| <i>hsp-60</i>   | 1.417        | 1.133        | 1.283        | 1.278       | 0.081      |
| <i>hsp-12.6</i> | 2.965        | 3.132        | 2.893        | 2.997       | 0.070      |



**Table S14. Primers used for the analysis of mRNA expression levels in nematode.**

| <b>Gene</b>     | <b>Forward primer</b>                     | <b>Reverse primer</b>                  |
|-----------------|-------------------------------------------|----------------------------------------|
| <i>cdc-42</i>   | CTGCTGGACAGGAAGATTACG                     | CTCGGACATTCTCGAATGAAG                  |
| <i>hsp-16.2</i> | CTGCAGAATCTCTCCATCTGAGTC                  | AGATTCTGAAGCAACTGCACC                  |
| <i>hsp-60</i>   | AGGAGAAGCTTAATGAGCG                       | ACACGGTCCTTCTTCTCT                     |
| <i>hsp-6</i>    | AGGAACAACAGAGTAAGATTTTC                   | TCGATTTGGTCCTTGGAAG                    |
| <i>sod-3</i>    | AGCATCATGCCACCTACGTGA                     | CACCACCATTGAATTTTCAGCG                 |
| <i>ctl-1</i>    | GAATGTGAAGAATTATTTTCGCTGA                 | GAATGTGAAGAATTATTTTCGCTGA              |
| <i>daf-2</i>    | CGGTGCGAAGAGAGGATATT                      | TACAGAGGTCGCCGTTACTG                   |
| <i>gst-4</i>    | TCCGTCAATTCACCTTCTCCG                     | AAGAAATCATCACGGGCTGG                   |
| <i>hsf-1</i>    | TTGACGACGACAAGCTTCCAGT                    | AAAGCTTGCACCAGAATCATCCC                |
| <i>daf-16</i>   | TTTCCG TCC CCG AACTCA                     | ATTCGCCAACCCATGATGG                    |
| <i>hsp-12.6</i> | GTG ATG GCTGACGAAGGAAC                    | GGGAGGAAGTTATGGGCTTC                   |
| <i>skn-1</i>    | AGTGTCGGCGTTCCAGATTTTC                    | GTCGACGAATCTTGCGAATCA                  |
| <i>hsp-16.1</i> | GTCACCTTACCACCTATTTCCGTCCAGC<br>TCAACGTTC | CAACGGGCGCTTGCTGAATTGGAATA<br>GATCTTCC |
