# Supplementary material for: Dendrobium Nobile Alcohol Extract Extends the Lifespan of Caenorhabditis elegans via hsf-1 and daf-16
Source: MDPI journal article supplement (doi:10.3390/molecules29040908), 2024-02-19
Supplement: s1 [file s1]

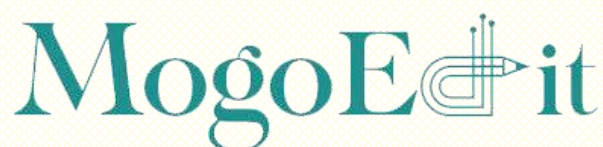

## CERTIFICATE OF ENGLISH EDITING

This is to certify that the manuscript entitled  
***Dendrobium nobile Alcohol Extract Delays Progression of Ag-ing-Related Diseases and Extends Lifespan of Caenorhabditis elegans via HSF-1 and DAF-16***

commissioned to us has been carefully edited by a native English-speaking editor of MogoEdit, and the grammar, spelling, and punctuation have been verified and corrected where needed. Based on this review, we believe that the language in this paper meets academic journal requirements. Please contact us with any questions.

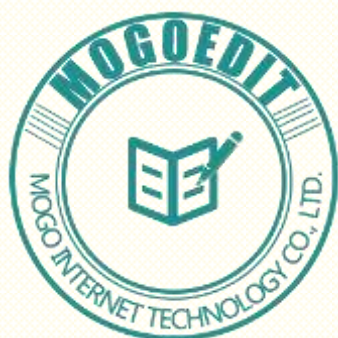

*Gang Zhang*

Dr. Gang Zhang  
Founder & CEO of MogoEdit

Date of Issue  
June 19, 2023

**Disclaimer:** The changes in the document may be accepted or rejected by the authors in their sole discretion after our editing. However, MogoEdit is not responsible for revisions made to the document after our edit on **June 19, 2023**.

MogoEdit is a professional English editing company who provides English language editing, translation, and publication support services to individuals and corporate customers worldwide. As a company invested by the affiliate fund of Chinese Academy of Science, MogoEdit is one of the leading language editing service providers in China, whose clients come from more than 1000 universities and research institutes.

MogoEdit Website: <http://en.mogoedit.com/>

500+ native English editors: <http://en.mogoedit.com/editors>

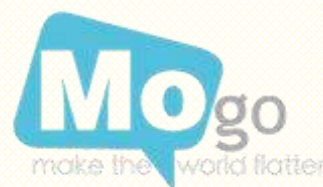

---

Mogo Internet Technology Co., LTD.

No. 57, 3rd Keji Road, Xi'an 710075, PR China +86 02988317483

[support@mogoedit.com](mailto:support@mogoedit.com)
