# Supplementary material for: Dendrobium Nobile Alcohol Extract Extends the Lifespan of Caenorhabditis elegans via hsf-1 and daf-16
Source: MDPI journal article supplement (doi:10.3390/molecules29040908), 2024-02-19

# Mass spectrum of the compounds contained in DnAE

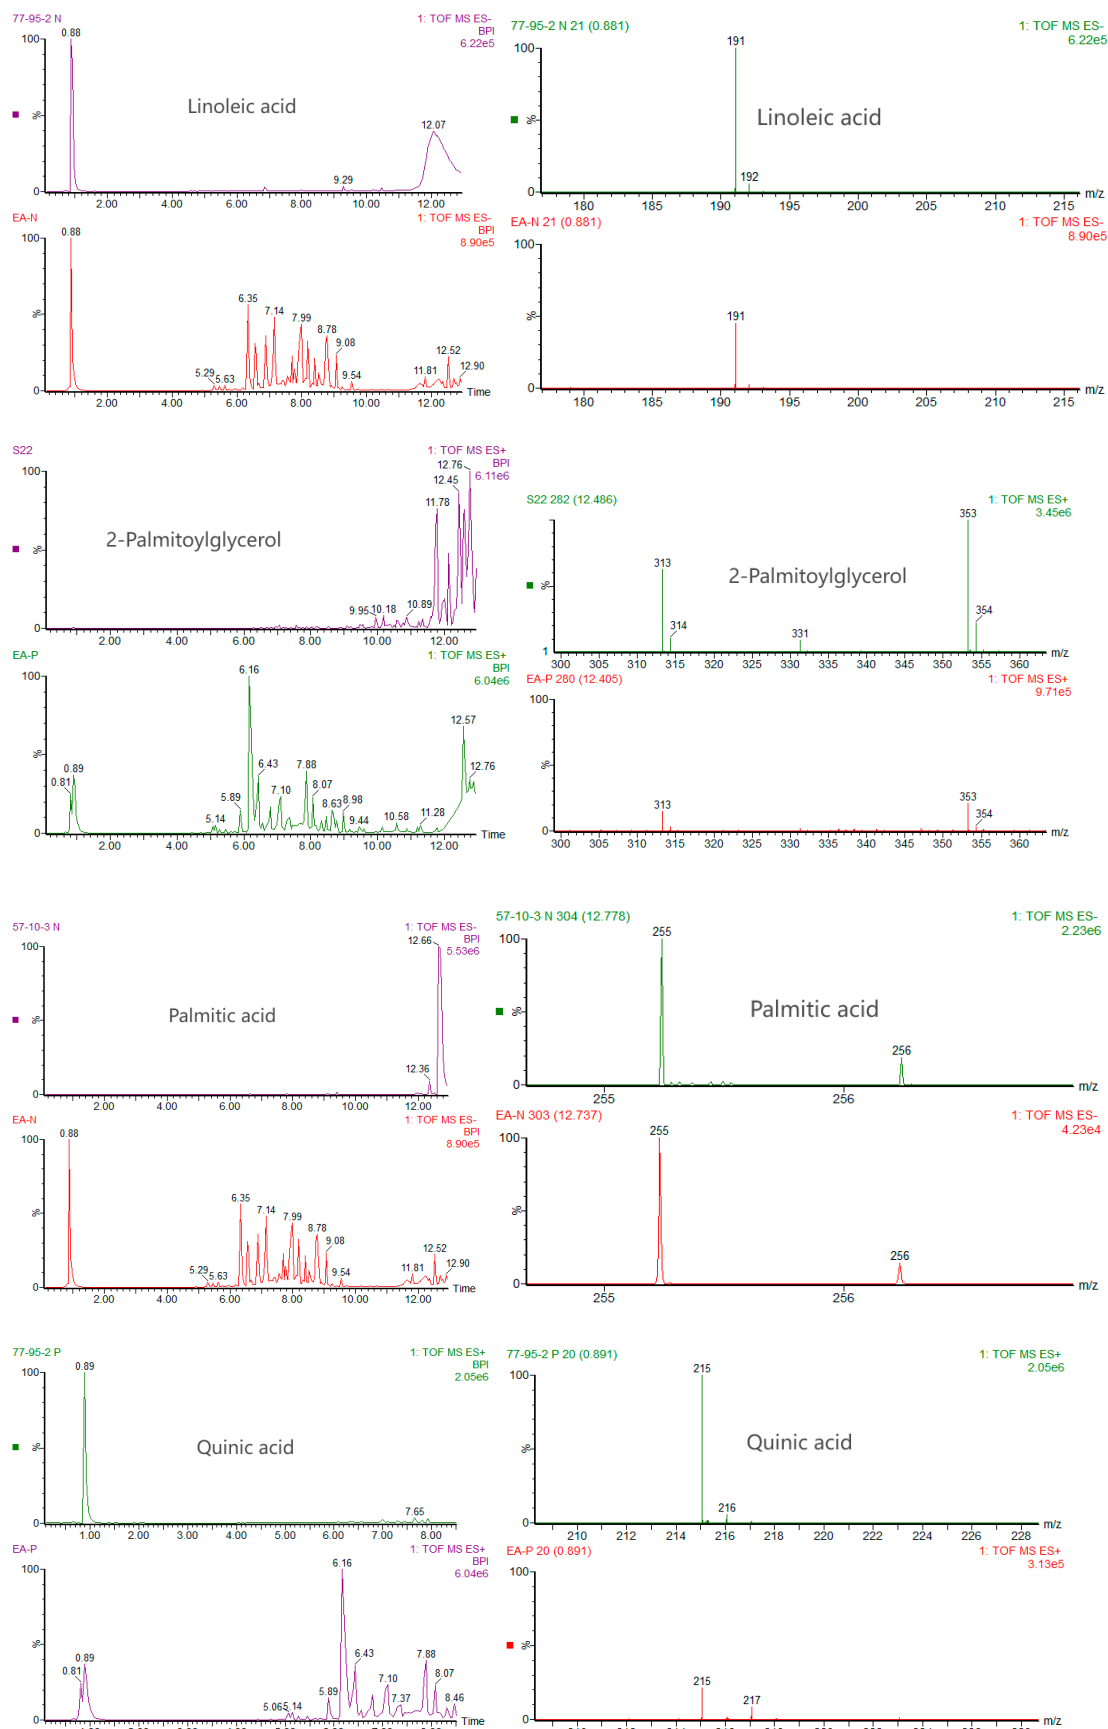

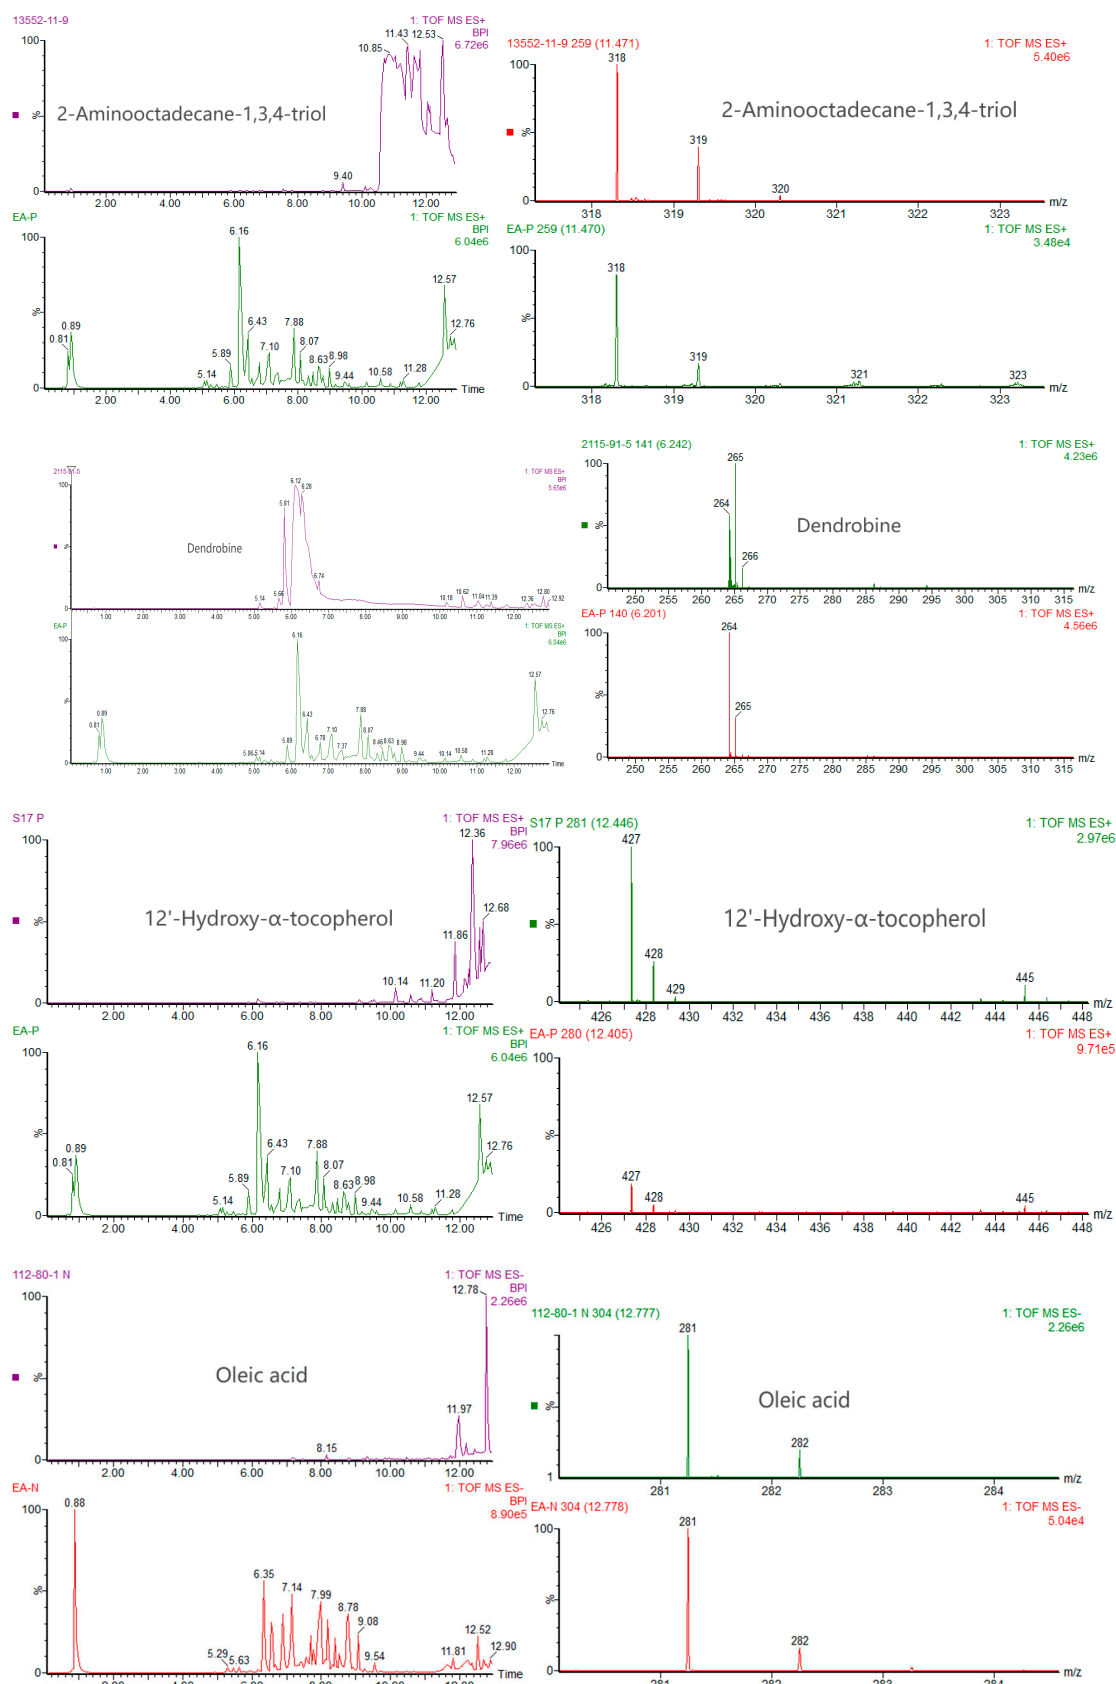

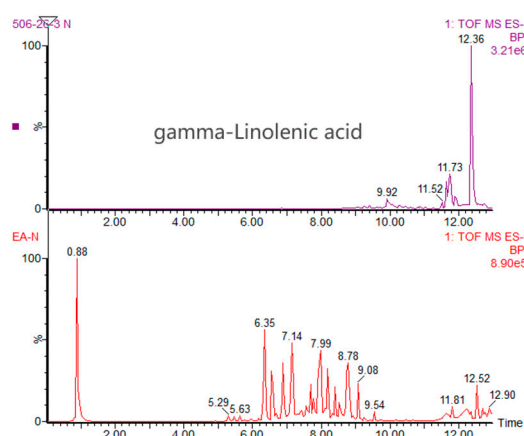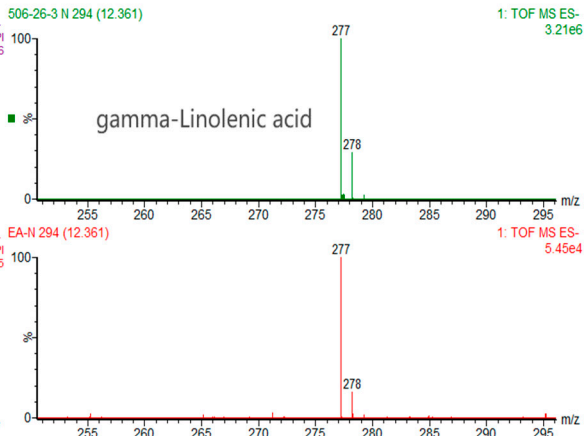

# Mass spectrum of the compounds not contained in DnAE

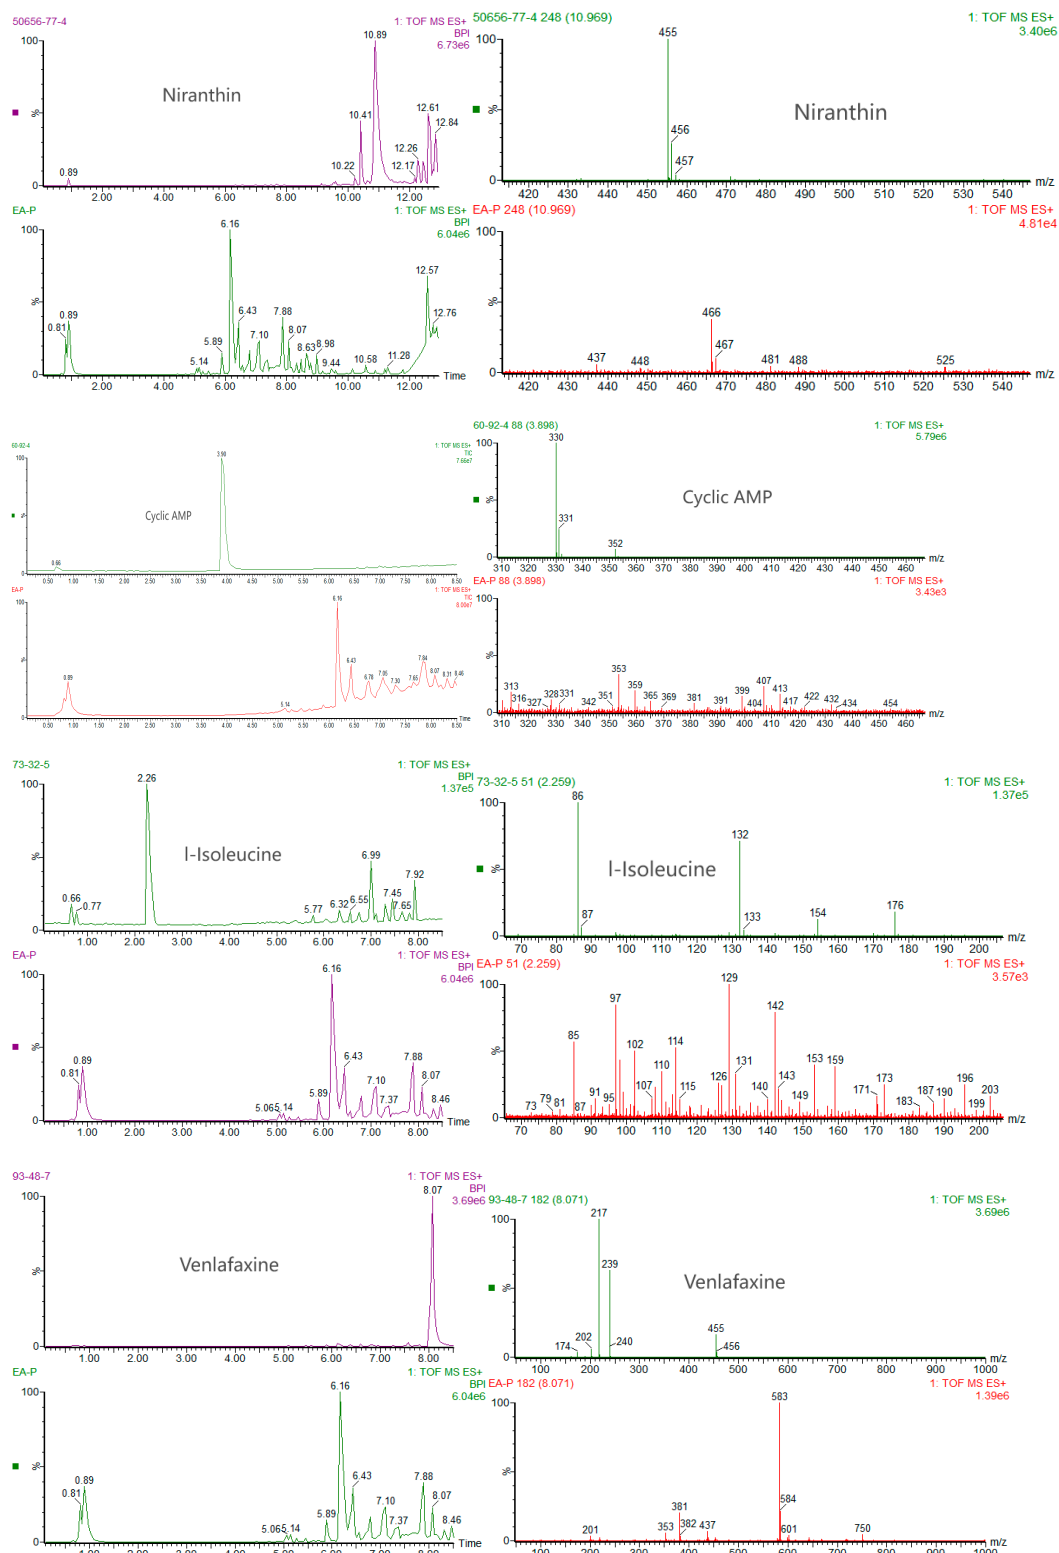

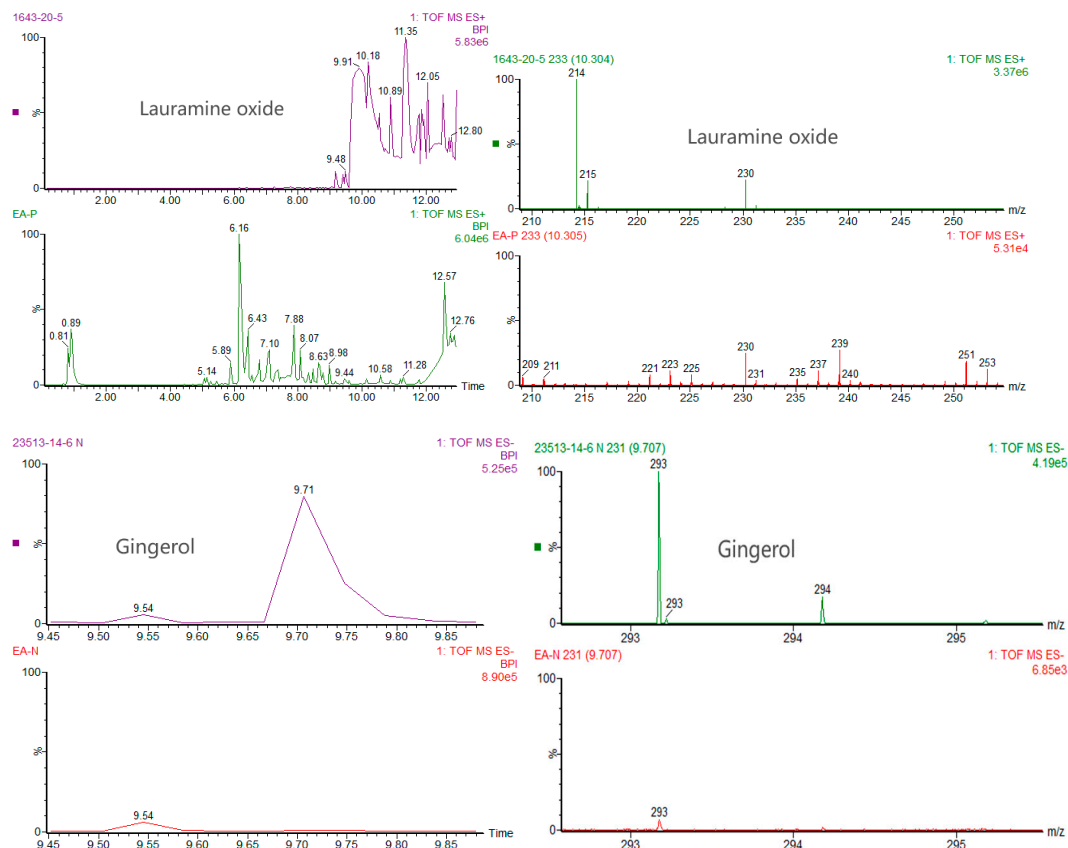

Supplement: s1 [file s1]
