# Supplementary material for: Dendrobium Nobile Alcohol Extract Extends the Lifespan of Caenorhabditis elegans via hsf-1 and daf-16
Source: MDPI journal article supplement (doi:10.3390/molecules29040908), 2024-02-19
Supplement: s1 [file s1]

Manuscript ID: \_\_\_\_\_

Submitting Author: \_\_\_\_\_

[illegible]

Note: insert the relevant information and select only the techniques used in this study. In the empty columns you can insert any additional methods.

[illegible]

[illegible]

[illegible]

[illegible]
